# Supplementary material for: Light-induced carboxylation of aryl derivatives with cooperative COF as an active photocatalyst and Ni(ii) co-catalyst
Source: Royal Society of Chemistry journal article supplement (doi:10.1039/d0nj05843b), 2021-01-01
Supplement: d0nj05843b1.pdf [file d0nj05843b1.pdf]

## Supporting Information

### **Light induced carboxylation of Aryl derivatives with cooperative COF as active photocatalyst and Ni(II) co-catalyst**

PekhamChakraborty,<sup>a</sup>Anjan Das,<sup>a</sup> Arpita HazraChowdhury,<sup>a</sup>Swarbhanu Ghosh, <sup>a</sup>Aslam Khan,<sup>b</sup>Sk. ManirulIslam<sup>a\*</sup>

<sup>a</sup>Department of Chemistry, Kalyani University, Kalyani, West Bengal, 741235, India

<sup>b</sup>King Abdullah Institute for Nanotechnology, King Saud University, Riyadh, 11451, Saudi Arabia

### **Contents**

|                                                                 |             |
|-----------------------------------------------------------------|-------------|
| 1. Instrumentation .....                                        | Page S2     |
| 2. Reaction Set-up .....                                        | Page S2     |
| 3. <sup>1</sup> H & <sup>13</sup> C-NMR data of products .....  | Page S3-S5  |
| 4. <sup>1</sup> H & <sup>13</sup> C-NMR Spectra of product..... | Page S6-S28 |

## Instrumentation

*NMR Spectra:*  $^1\text{H}$ NMR spectra were recorded on a Bruker 400 MHz spectrometer. Chemical shifts for protons is reported in parts per million (ppm).

*PXRD:* The PXRD analysis was performed by using an X-ray diffractometer (BRUKER, Powder X-Ray ecoD8 ADVANCE) equipped with Ni-filtered  $\text{Cu K}\alpha$  ( $\lambda = 0.15406$  nm) radiation.

*SEM:* FESEM images of the catalyst were acquired by using Scanning Electron Microscope (SEM) [JEOL JSM IT 300], was done to know about the morphological information of the sample.

*TEM:* Transmission Electron Microscope (TEM) [JEOL JEM 2100] was used obtain the morphological information of the sample.

*BET:* The  $\text{N}_2$  adsorption-desorption analysis of TFG-DAAQ COF sample was conducted by using a BET Surface Analyzer [QUANTACHROME ASIQC602-5].

*Fluorescence Spectroscopy:* The Fluorescence Emission spectra was recorded by using Horiba Fluoro Max 4 spectrometer.

## Reaction setup:

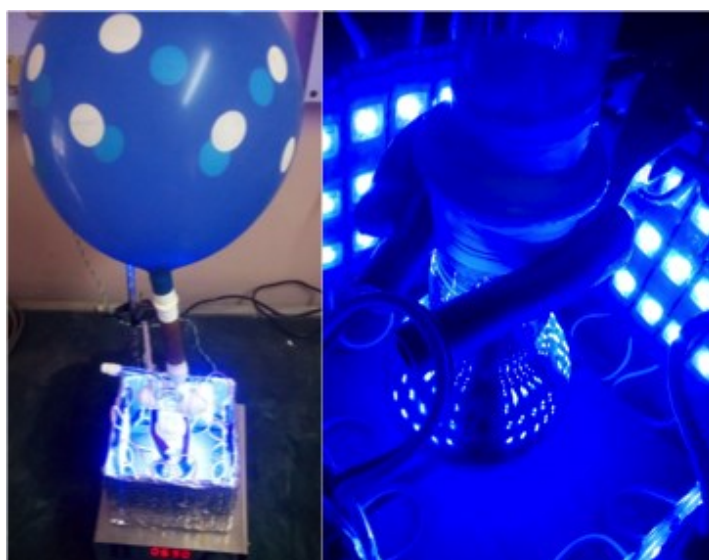

**<sup>1</sup>H & <sup>13</sup>C-NMR data of products:**

| Entry | Compound                                                                            | NMR analysis                                                                                                                                                                                                                                                                                       |
|-------|-------------------------------------------------------------------------------------|----------------------------------------------------------------------------------------------------------------------------------------------------------------------------------------------------------------------------------------------------------------------------------------------------|
| 1     | 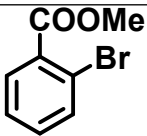   | Yellowish oil, yield 83%, <sup>1</sup> H- NMR (CDCl <sub>3</sub> , 400MHz): 7.80-7.77 (1H, m), 7.67-7.65 (1H, m), 7.38-7.26 (2H, m), 3.93 (3H, s).<br><sup>13</sup> C-NMR (CDCl <sub>3</sub> , 100MHz): 166.63, 134.34, 132.60, 132.07, 131.31, 127.17, 121.65, 52.51.                             |
| 2     |    | Yellowish oil, yield 81%, <sup>1</sup> H- NMR (CDCl <sub>3</sub> , 400MHz): 7.71-7.67 (1H, m), 7.58-7.53 (1H, m), 7.27-7.19 (2H, m), 3.85-3.82 (3H, d, J=12Hz).<br><sup>13</sup> C-NMR (CDCl <sub>3</sub> , 100MHz): 166.72, 134.43, 132.63, 132.32, 131.38, 127.24, 121.74, 52.53                 |
| 3     |  | Yellowish oil, yield 85%, <sup>1</sup> H- NMR (CDCl <sub>3</sub> , 400MHz): 7.79-7.77 (1H, m), 7.66-7.64 (1H, m), 7.38-7.27 (2H, m), 3.93 (3H, s).<br><sup>13</sup> C-NMR (CDCl <sub>3</sub> , 100MHz): 166.63, 134.36, 132.58, 132.24, 131.32, 127.18, 121.67, 52.46.                             |
| 4     |  | Yellowish oil, yield 85%, <sup>1</sup> H- NMR (CDCl <sub>3</sub> , 400MHz): 8.09 (1H, s), 7.89-7.88 (1H, d, J=4Hz), 7.61-7.59 (1H, d, J=8Hz), 7.26-7.19 (1H, m), 3.84 (3H, s).<br><sup>13</sup> C-NMR (CDCl <sub>3</sub> , 100MHz): 165.80, 135.89, 132.62, 132.03, 129.97, 128.17, 122.46, 52.46. |

|    |                                                                                     |                                                                                                                                                                                                                                                                                                  |
|----|-------------------------------------------------------------------------------------|--------------------------------------------------------------------------------------------------------------------------------------------------------------------------------------------------------------------------------------------------------------------------------------------------|
| 5  | 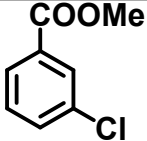   | Yellowish oil, yield 81%, $^1\text{H-NMR}$ ( $\text{CDCl}_3$ , 400MHz): 8.15-8.14 (1H, m), 7.95-7.92 (1H, m), 7.66-7.63 (1H, m), 7.30-7.28 (1H, m), 3.90-3.89 (3H, d, $J=4\text{Hz}$ ).                                                                                                          |
| 6  |    | Yellowish oil, yield 86%, $^1\text{H-NMR}$ ( $\text{CDCl}_3$ , 400MHz): 8.14 (1H, s), 7.94-7.92 (1H, d, $J=8\text{Hz}$ ), 7.65-7.63 (1H, m), 7.30-7.26 (1H, m), 3.89 (3H, s).<br>$^{13}\text{C-NMR}$ ( $\text{CDCl}_3$ , 100MHz): 165.79, 135.92, 132.68, 132.17, 130.01, 128.22, 122.53, 52.46. |
| 7  |    | Yellowish solid, yield 93%, $^1\text{H-NMR}$ ( $\text{CDCl}_3$ , 400MHz): 7.84-7.82 (1H, d, $J=4\text{Hz}$ ), 7.52-7.50 (1H, d, $J=4\text{Hz}$ ), 3.84 (3H, s).                                                                                                                                  |
| 8  |   | Yellowish solid, yield 95%, $^1\text{H-NMR}$ ( $\text{CDCl}_3$ , 400MHz): 8.28-8.31 (1H, m), 8.20-8.23 (1H, m), 3.98 (3H, s).<br>$^{13}\text{C-NMR}$ ( $\text{CDCl}_3$ , 100MHz): 165.20, 150.52, 135.47, 130.73, 123.57, 52.88.                                                                 |
| 9  |  | Yellowish solid, yield 95%, $^1\text{H-NMR}$ ( $\text{CDCl}_3$ , 400MHz): 8.28-8.31 (1H, m), 8.20-8.23 (1H, m), 3.98 (3H, s).<br>$^{13}\text{C-NMR}$ ( $\text{CDCl}_3$ , 100MHz): 165.20, 150.52, 135.47, 130.73, 123.57, 52.88.                                                                 |
| 10 |  | white solid, $^1\text{H-NMR}$ ( $\text{CDCl}_3$ , 400MHz): 7.80-7.78 (1H, d, $J=8\text{Hz}$ ), 7.22-7.21 (2H, d, $J=4\text{Hz}$ ), 6.85 (1H, s), 2.41 (3H, s).<br>$^{13}\text{C-NMR}$ ( $\text{CDCl}_3$ , 100MHz): 172.45, 133.86, 130.38, 129.89, 128.60, 128.28, 127.50, 28.28.                |

|    |                                                                                   |                                                                                                                                                                                                                                                                                                                                     |
|----|-----------------------------------------------------------------------------------|-------------------------------------------------------------------------------------------------------------------------------------------------------------------------------------------------------------------------------------------------------------------------------------------------------------------------------------|
| 11 | 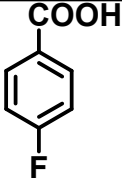 | <p>white solid, <math>^1\text{H}</math>- NMR (DMSO-<math>d_6</math>, 400MHz): 13.07(1H) ,8.01-7.98 (1H, m, ), 7.31-7.27 (1H, m).</p> <p><math>^{13}\text{C}</math>-NMR (DMSO-<math>d_6</math>, 100MHz): 166.34-166.10 (d, J = 24 Hz, C-F), 163.62, 132.11-132.01 (d, J = 10 Hz, C-H), 127.27, 115.69-115.47 (d, J= 22 Hz, C-H).</p> |
| 12 |  | <p>white solid, <math>^1\text{H}</math>- NMR (DMSO-<math>d_6</math> 400MHz): 8.33-8.31 (1H, d, J=8Hz), 8.17-8.15 (1H, d, J=8Hz).</p> <p><math>^{13}\text{C}</math>-NMR (DMSO-<math>d_6</math>, 100MHz): 166.27, 150.49, 136.81, 131.16, 124.21.</p>                                                                                 |
| 13 |  | <p>white solid, <math>^{13}\text{C}</math>-NMR (DMSO-<math>d_6</math>, 100MHz): 167.79, 159.59, 138.38, 129.73, 117.18, 55.64</p>                                                                                                                                                                                                   |

$^1\text{H}$  &  $^{13}\text{C}$  spectra of products:

17.01.2020

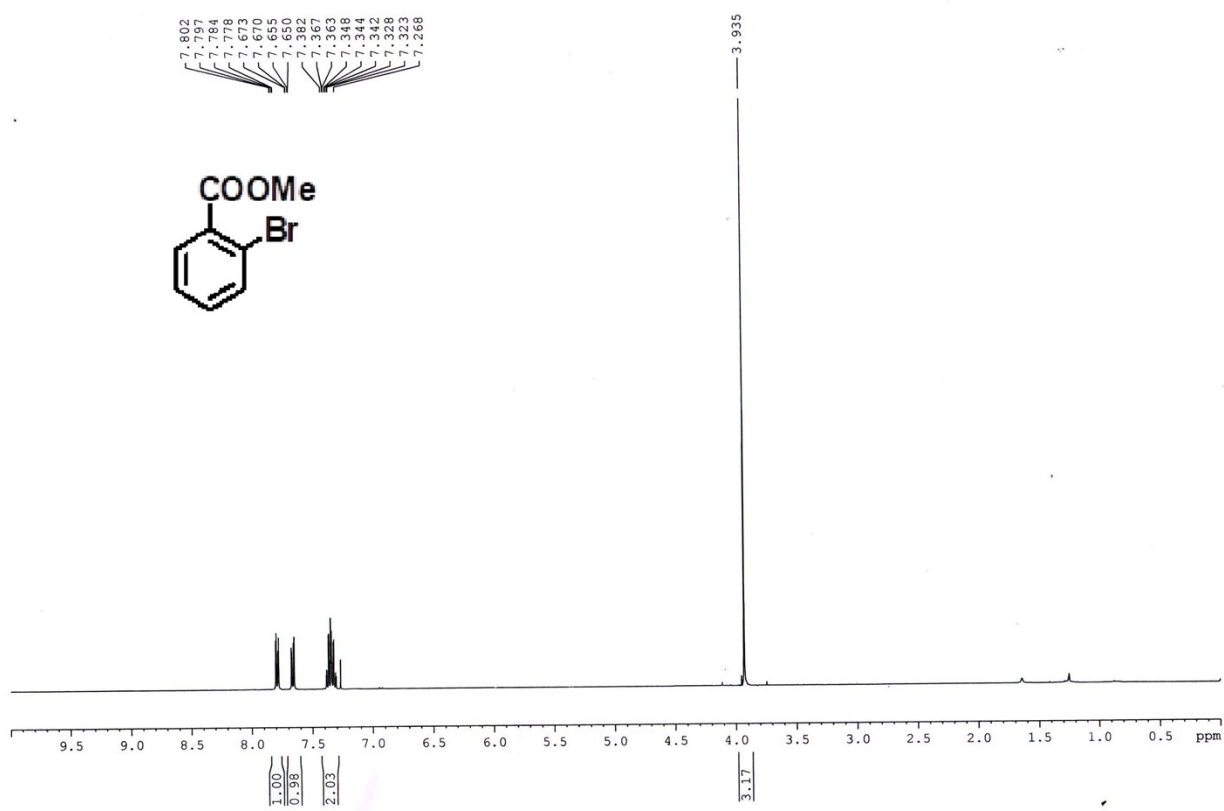

Figure 1:  $^1\text{H}$  NMR spectra of 2-Bromo-benzoic acid methyl ester (1)

22.01.2020

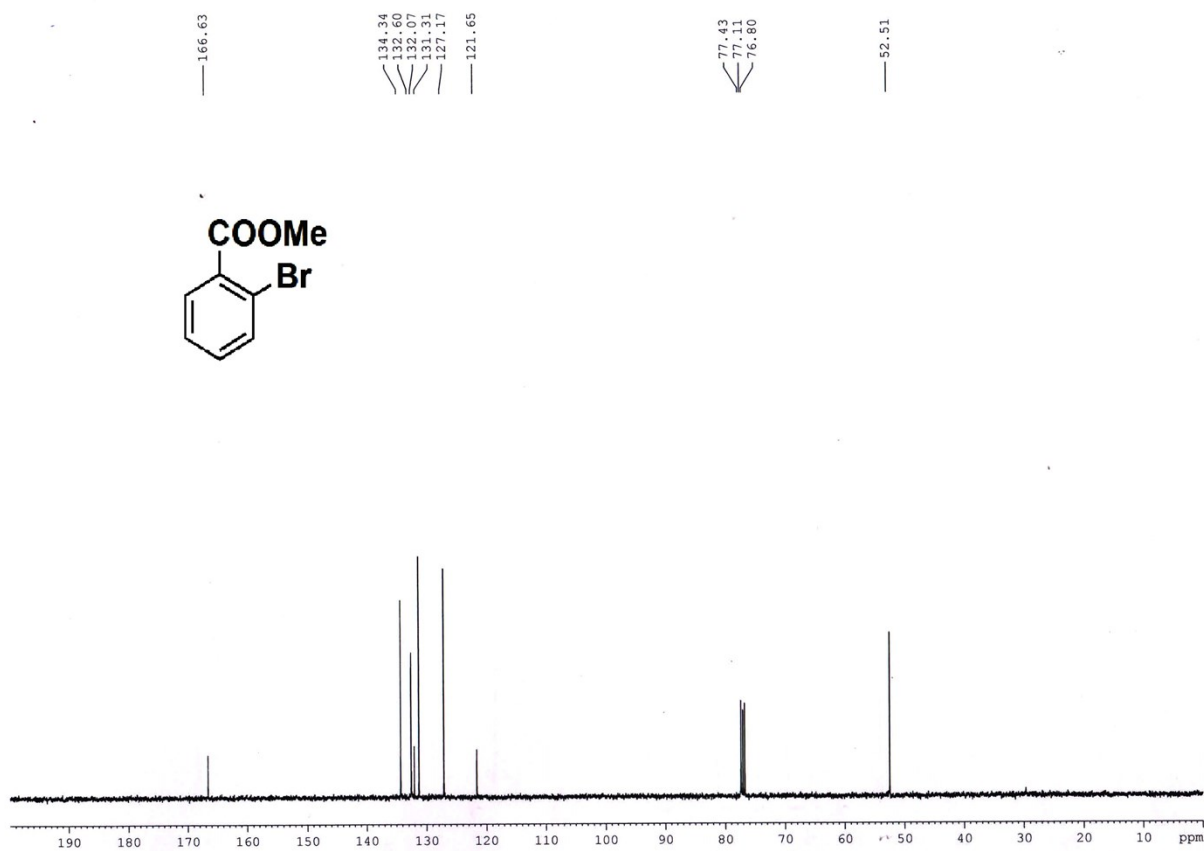

Figure 2:  $^{13}\text{C}$  NMR spectra of 2-Bromo-benzoic acid methyl ester (1)

19.02.2020

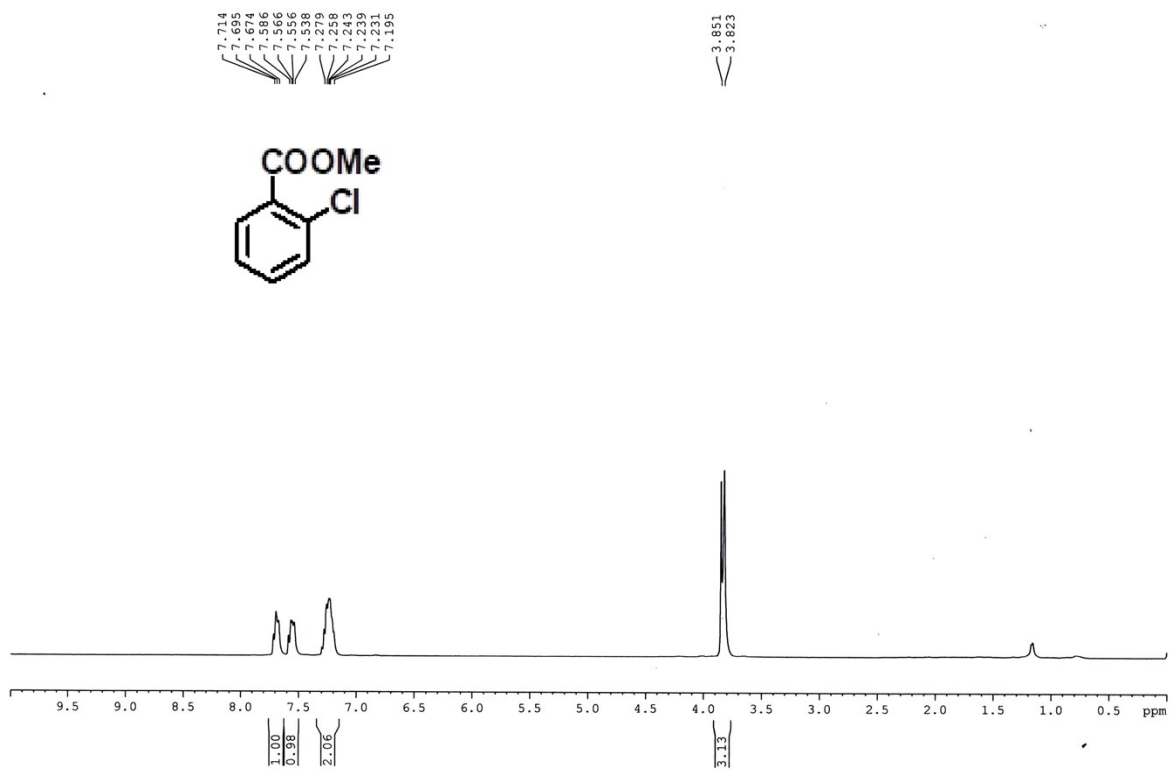

Figure 3:  $^1\text{H}$  NMR spectra of 2-Chloro-benzoic acid methyl ester (2)



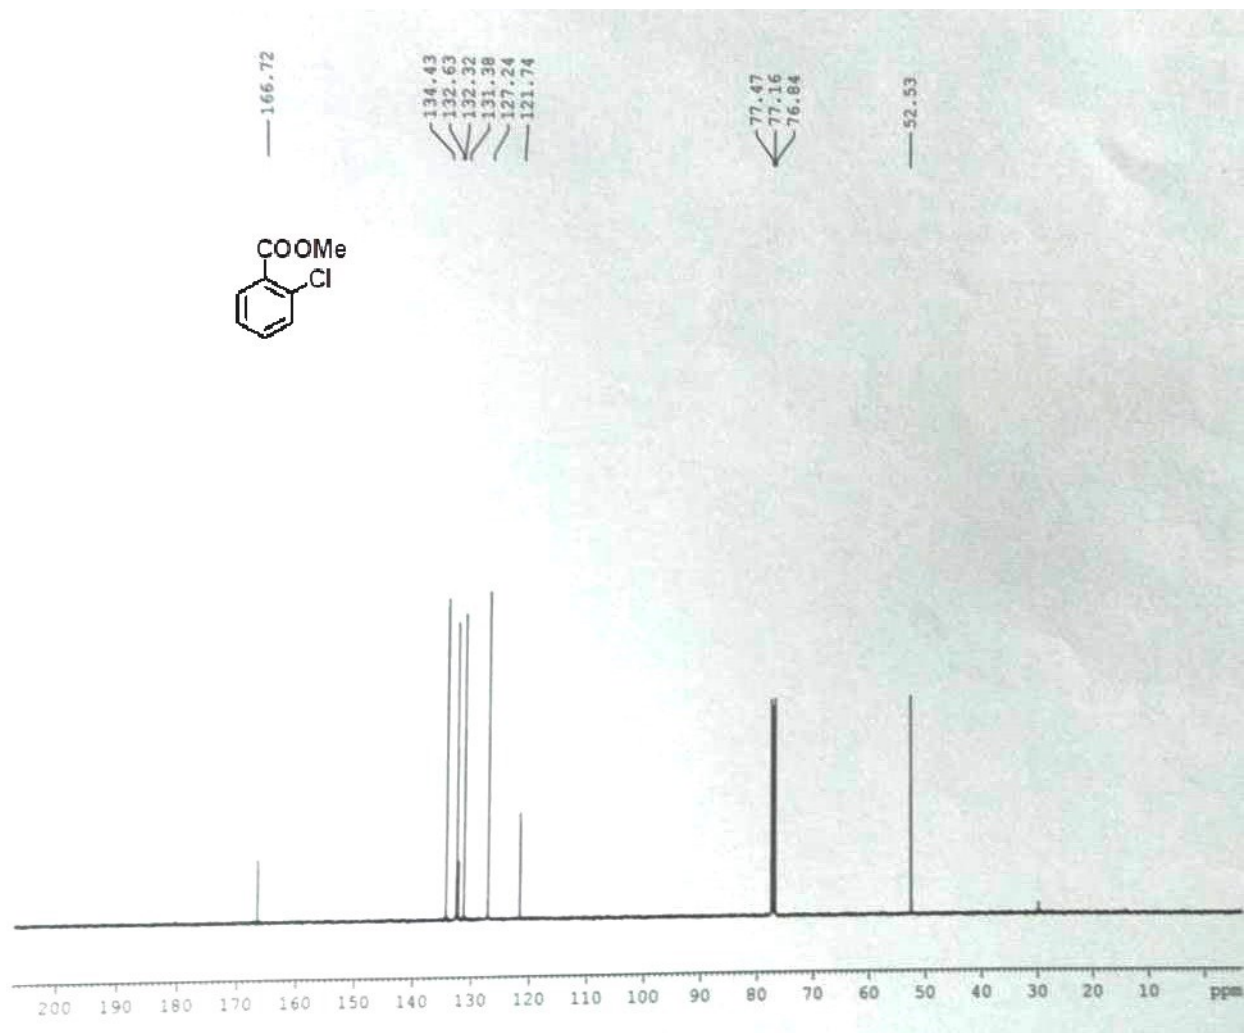

Figure 4:  $^{13}\text{C}$  NMR spectra of 2-Chloro-benzoic acid methyl ester (2)

12.02.2020

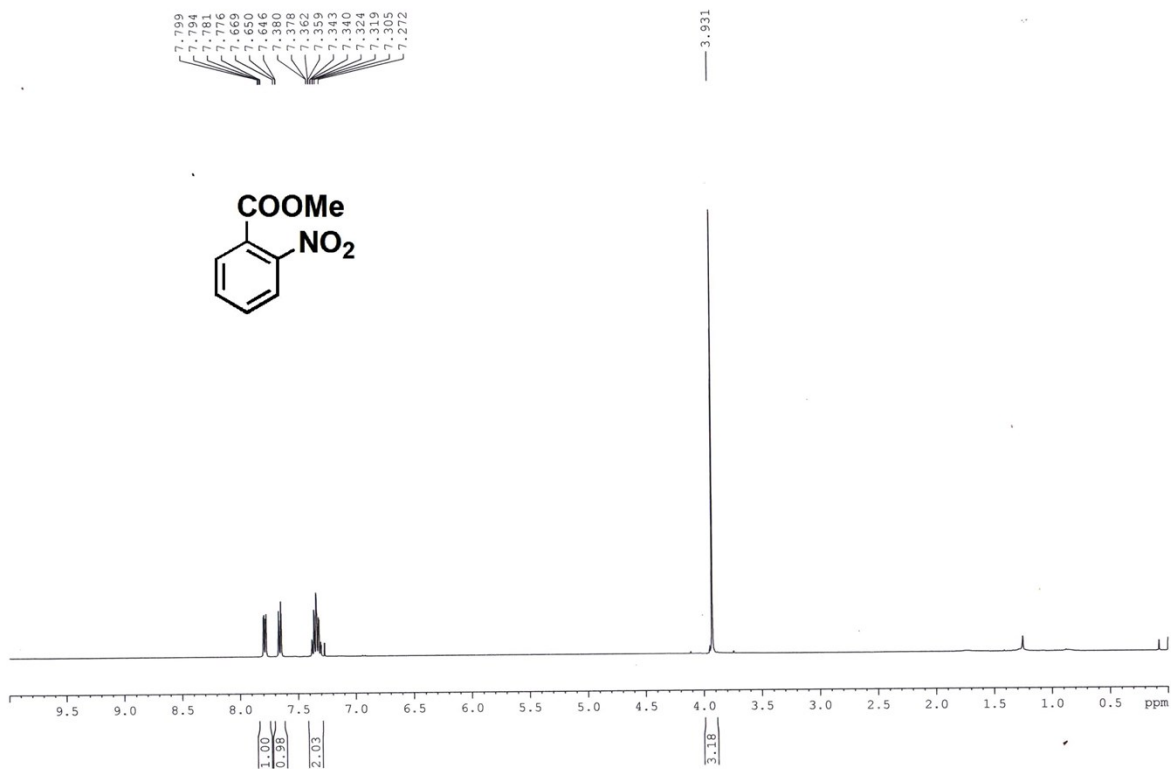

Figure 5:  $^1\text{H}$  NMR spectra of 2-Nitro-benzoic acid methyl ester (3)

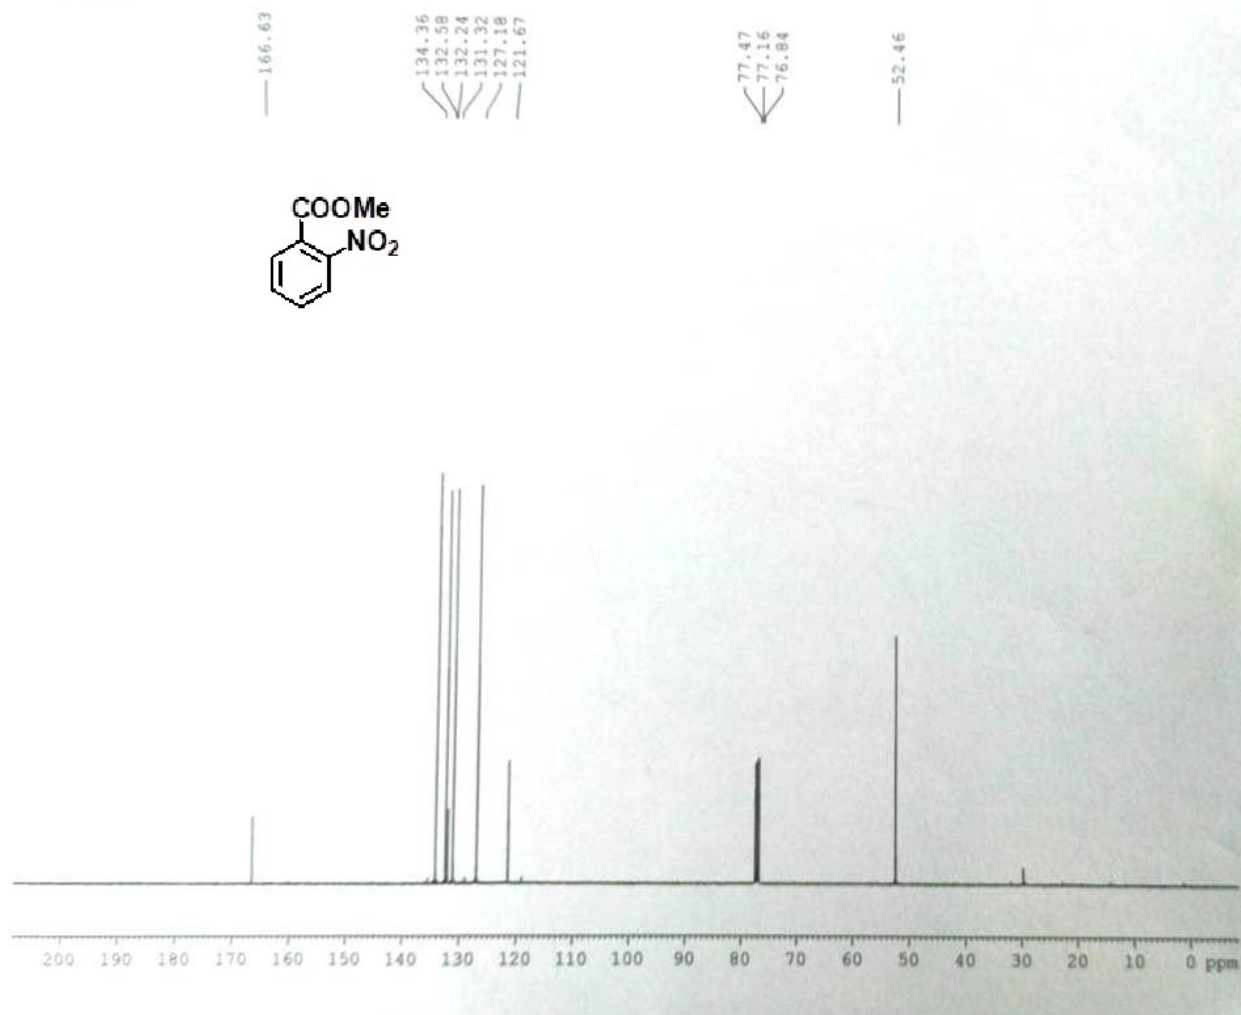

Figure 6: <sup>13</sup>C NMR spectra of 2-Nitro-benzoic acid methyl ester (3)

20.01.2020

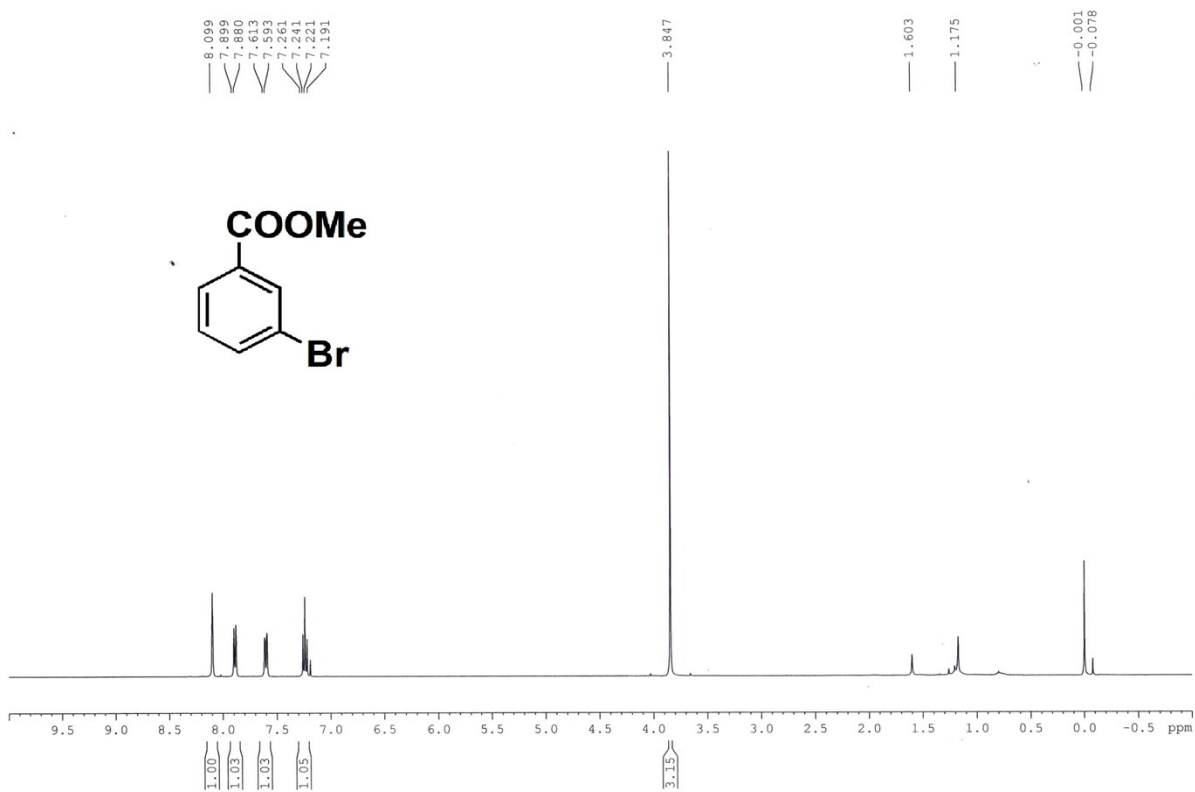

Figure 7:  $^1\text{H}$  NMR spectra of 3-Bromo-benzoic acid methyl ester (4)

27.01.2020

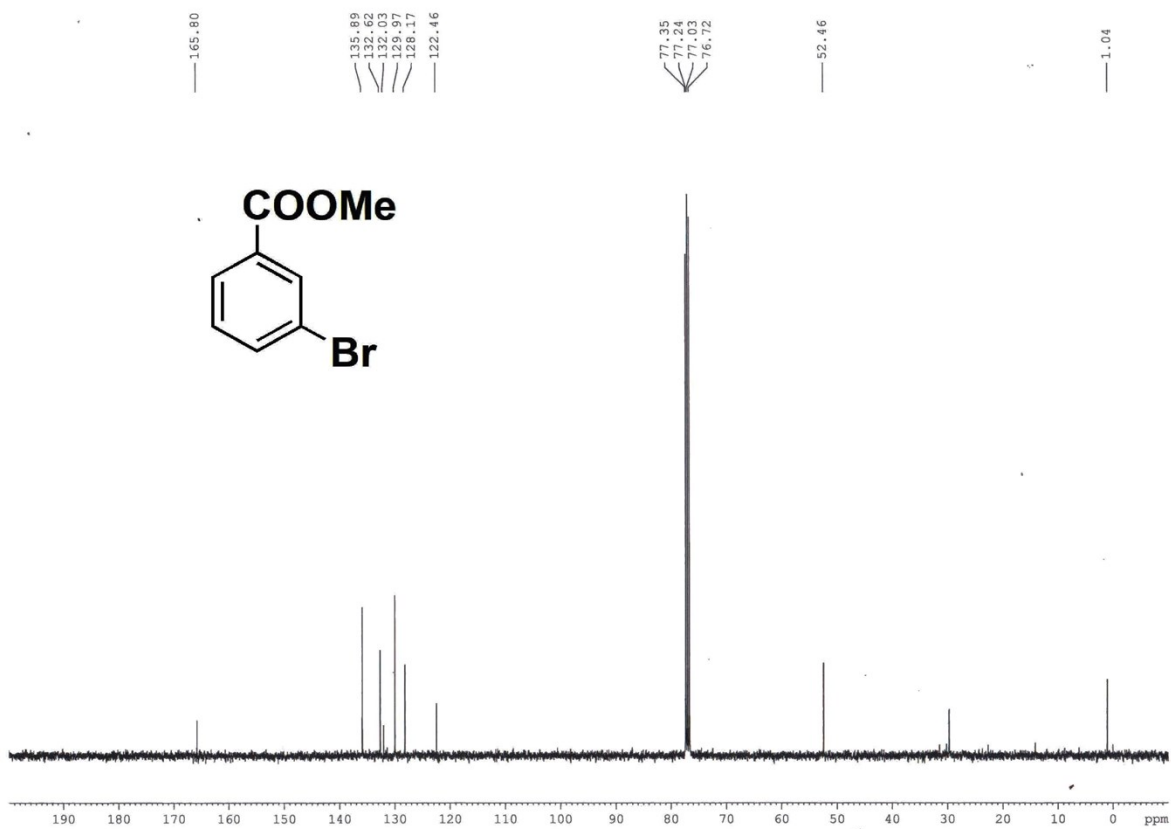

Figure 8:  $^{13}\text{C}$  NMR spectra of 3-Bromo-benzoic acid methyl ester (4)

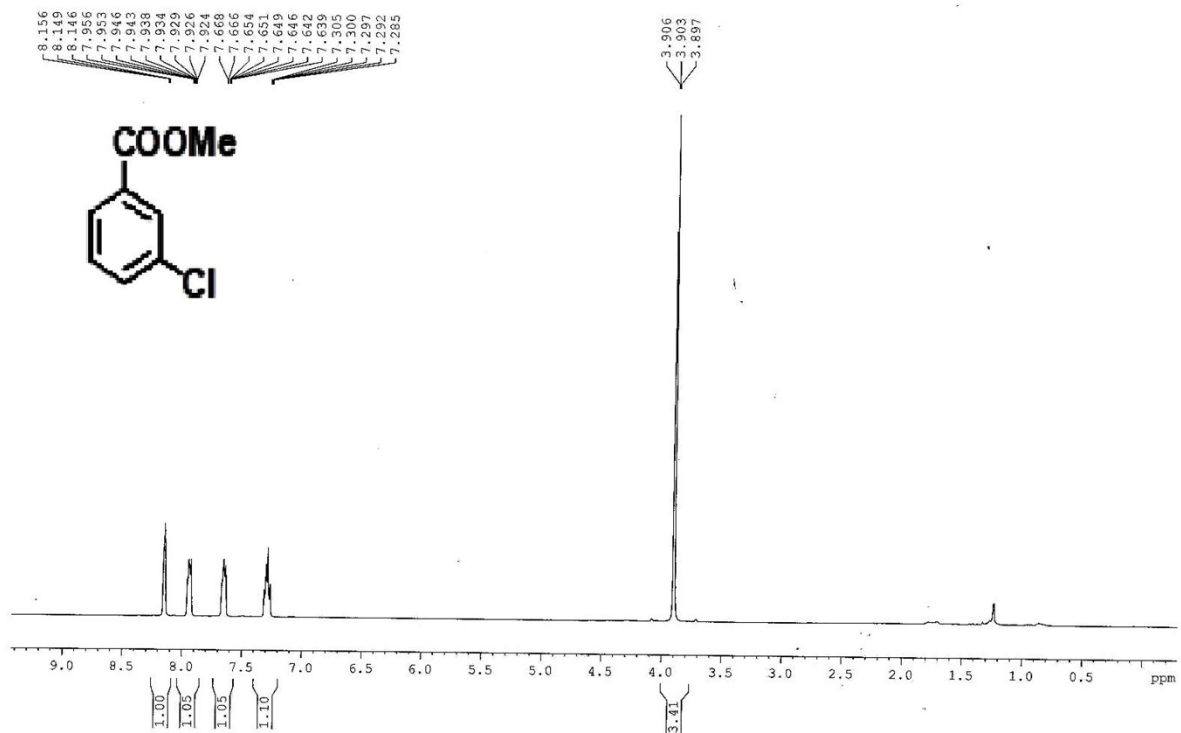

Figure 9: <sup>1</sup>H NMR spectra of 3-Chloro-benzoic acid methyl ester (5)

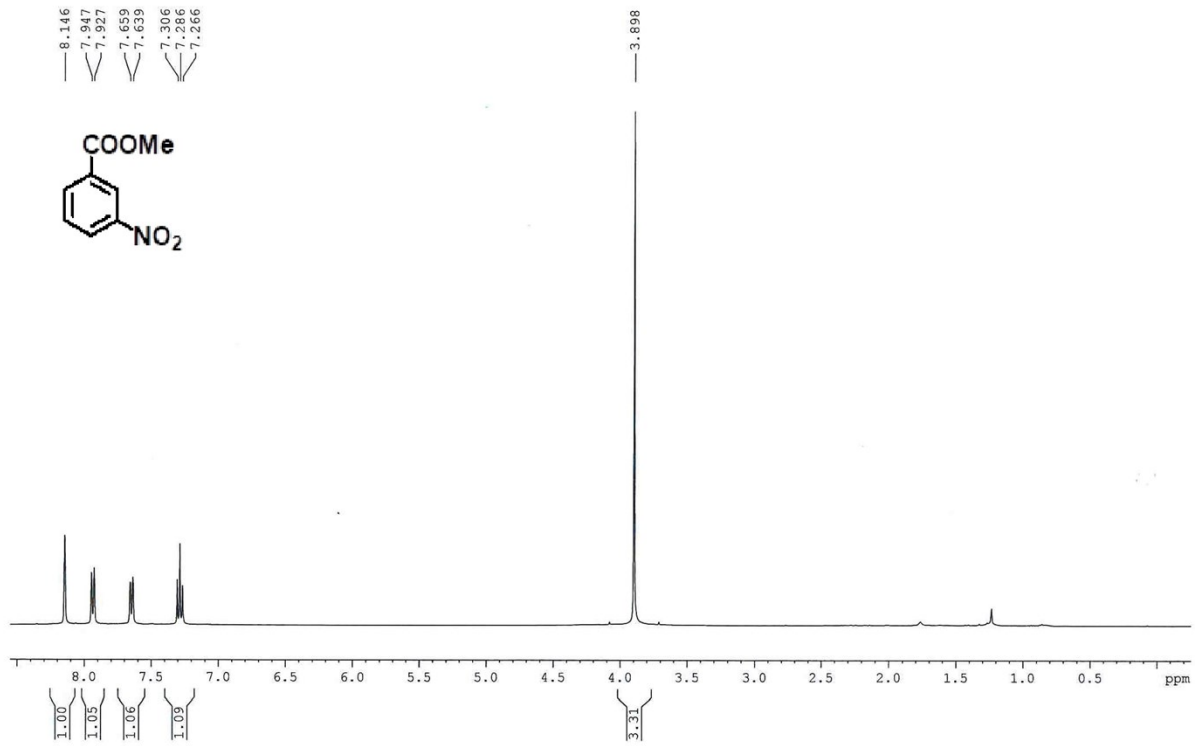

Figure 10:  $^1\text{H}$  NMR spectra of 3-Nitro-benzoic acid methyl ester (6)

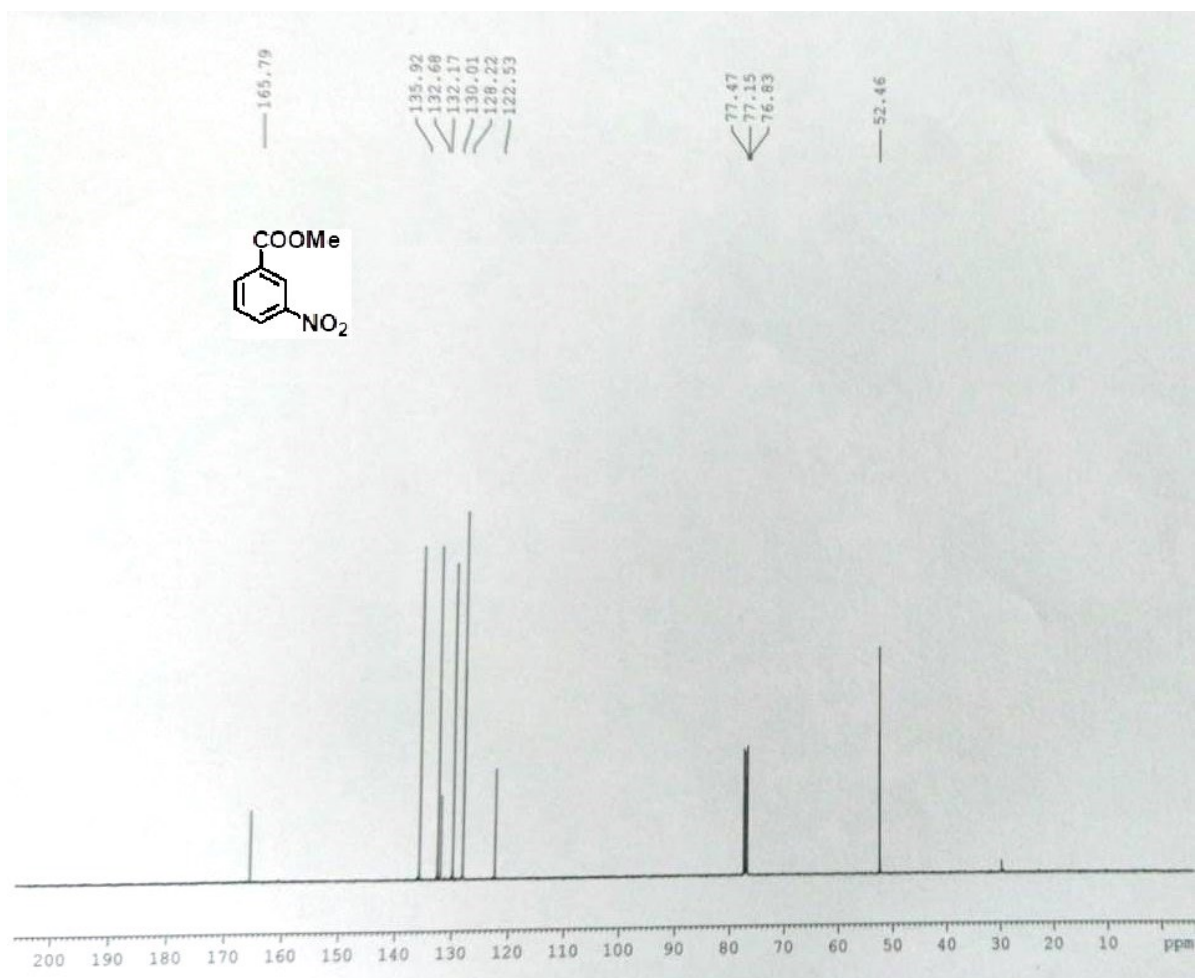

Figure 11:  $^{13}\text{C}$  NMR spectra of 3-Nitro-benzoic acid methyl ester (6)



18.02.2020

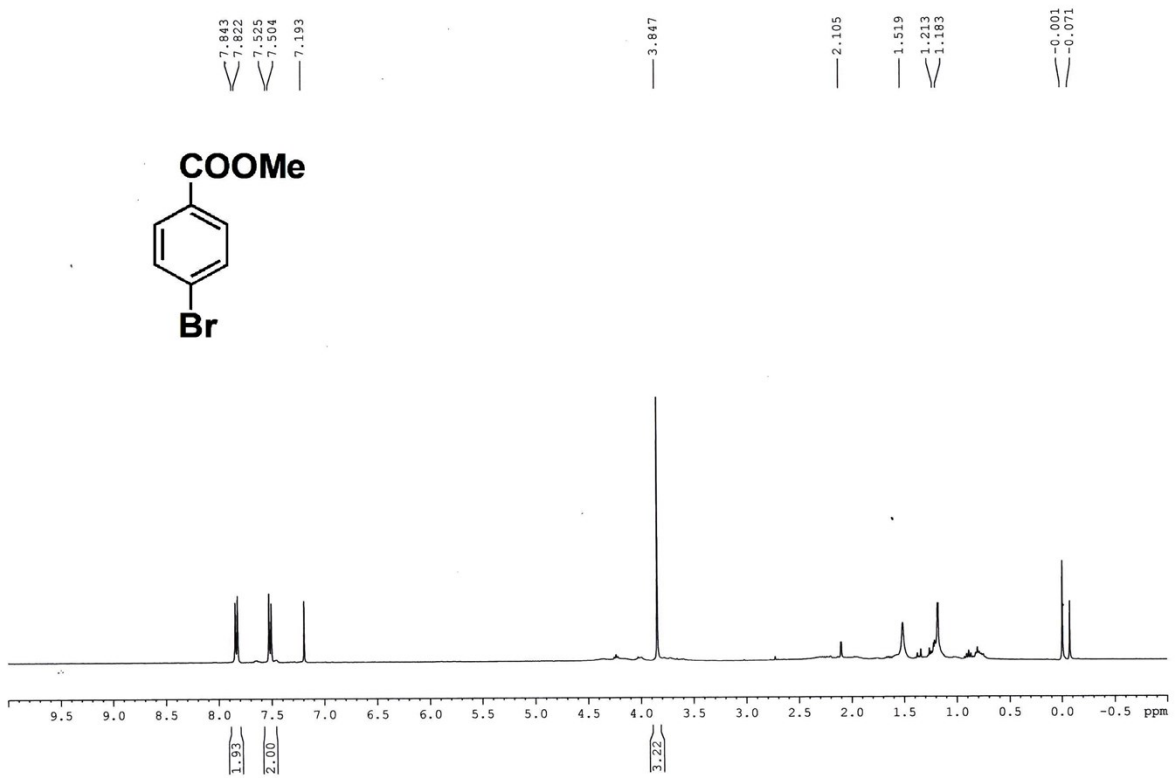

Figure 12: <sup>1</sup>H NMR spectra of 4-Bromo-benzoic acid methyl ester (7)

26.11.2019

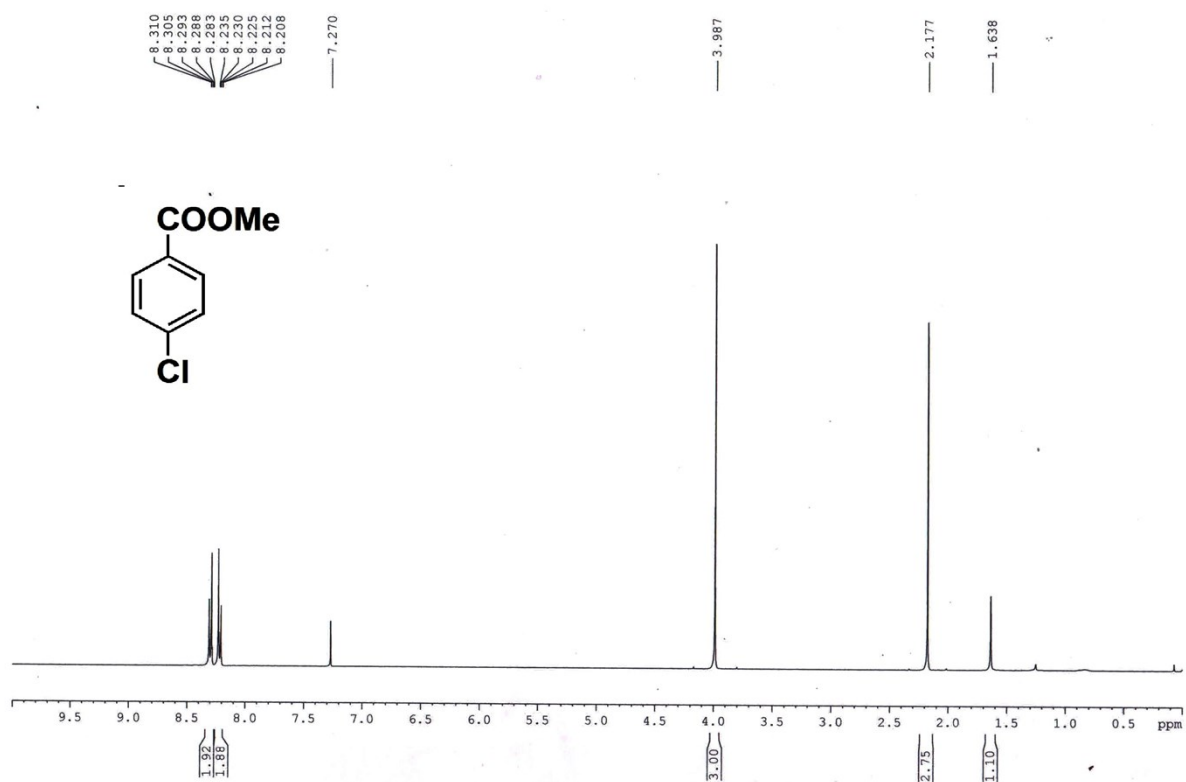

Figure 13: <sup>1</sup>H NMR spectra of 4-Chloro-benzoic acid methyl ester (8)

21.01.2020

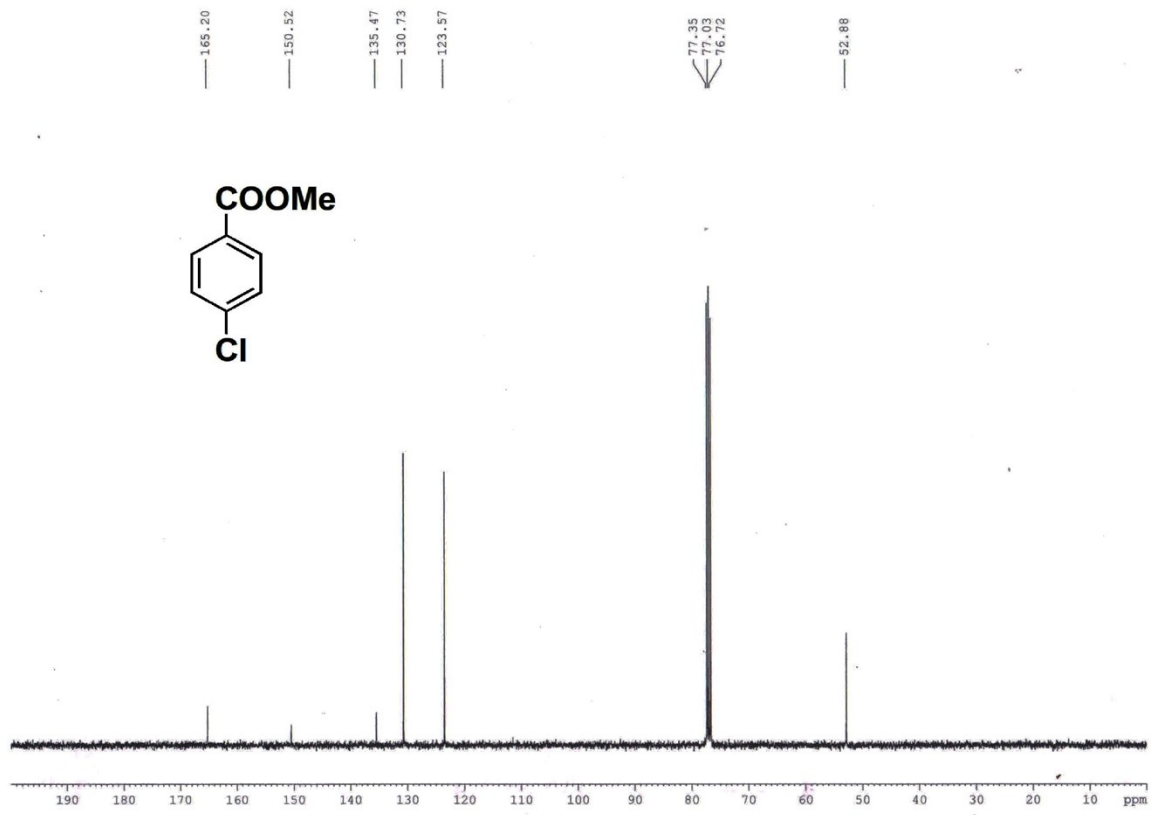

Figure 14:  $^{13}\text{C}$  NMR spectra of 4-Chloro-benzoic acid methyl ester (8)

12.02.2020

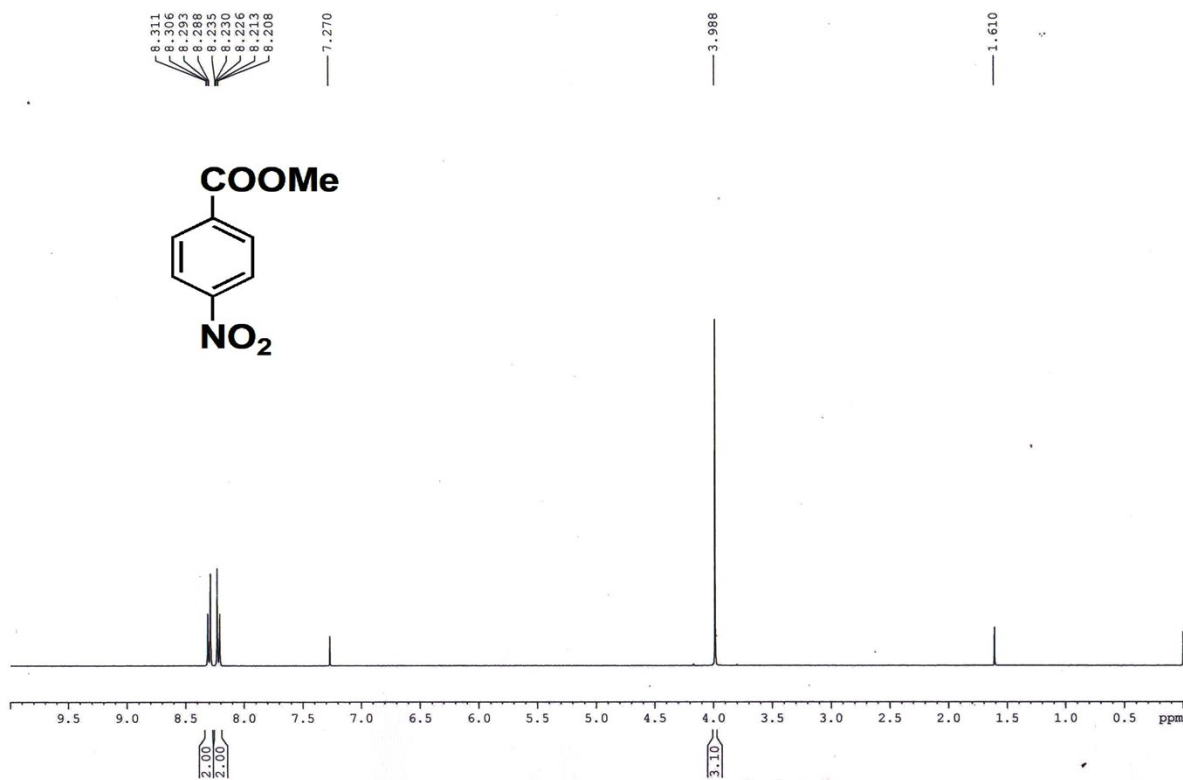

Figure 15: <sup>1</sup>H NMR spectra of 4-Nitro-benzoic acid methyl ester (9)

24.02.2020

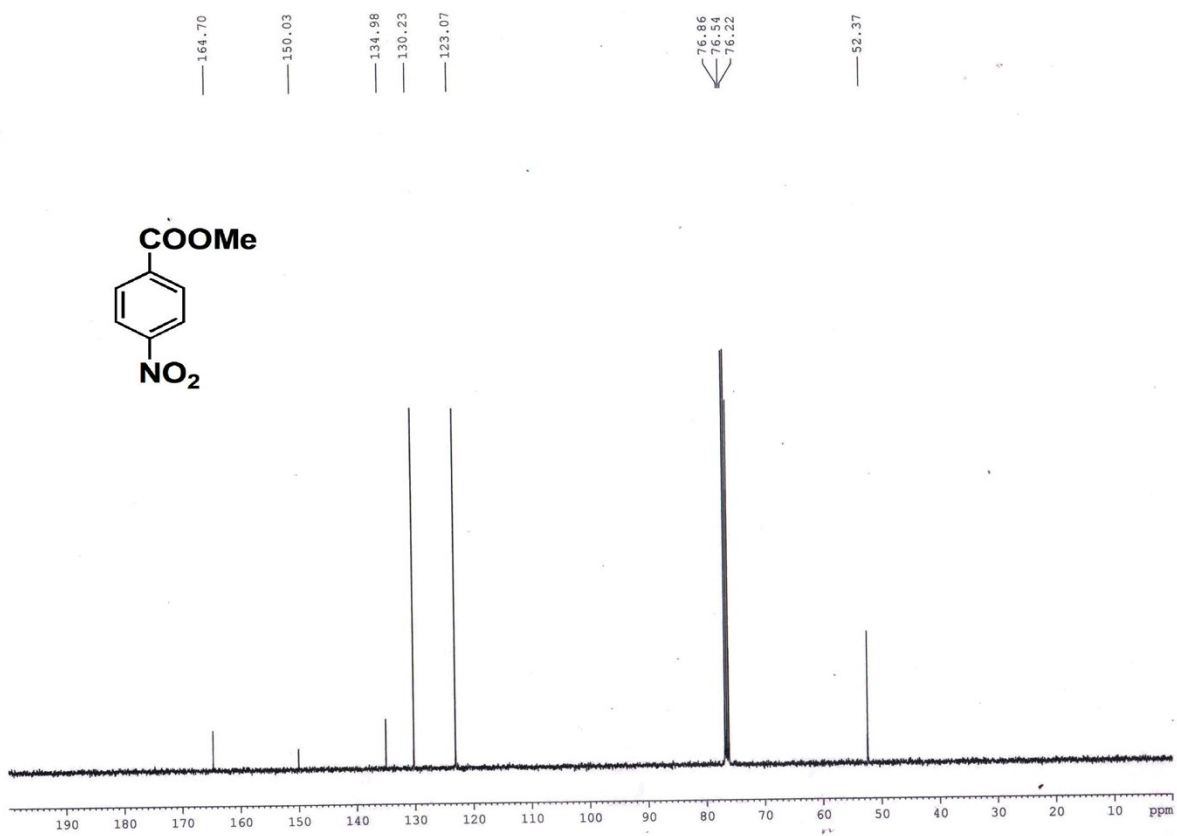

Figure 16:  $^{13}\text{C}$  NMR spectra of 4-Chloro-benzoic acid methyl ester (9)

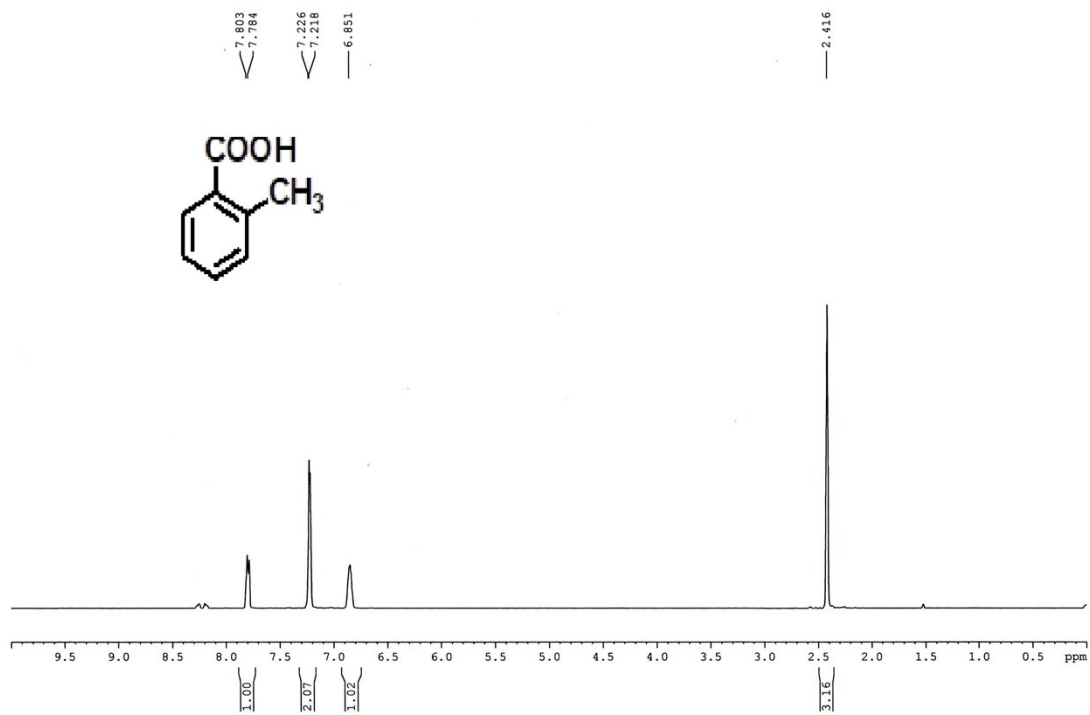

Figure 17: <sup>1</sup>H NMR spectra of 2-Methyl-benzoic acid (10)

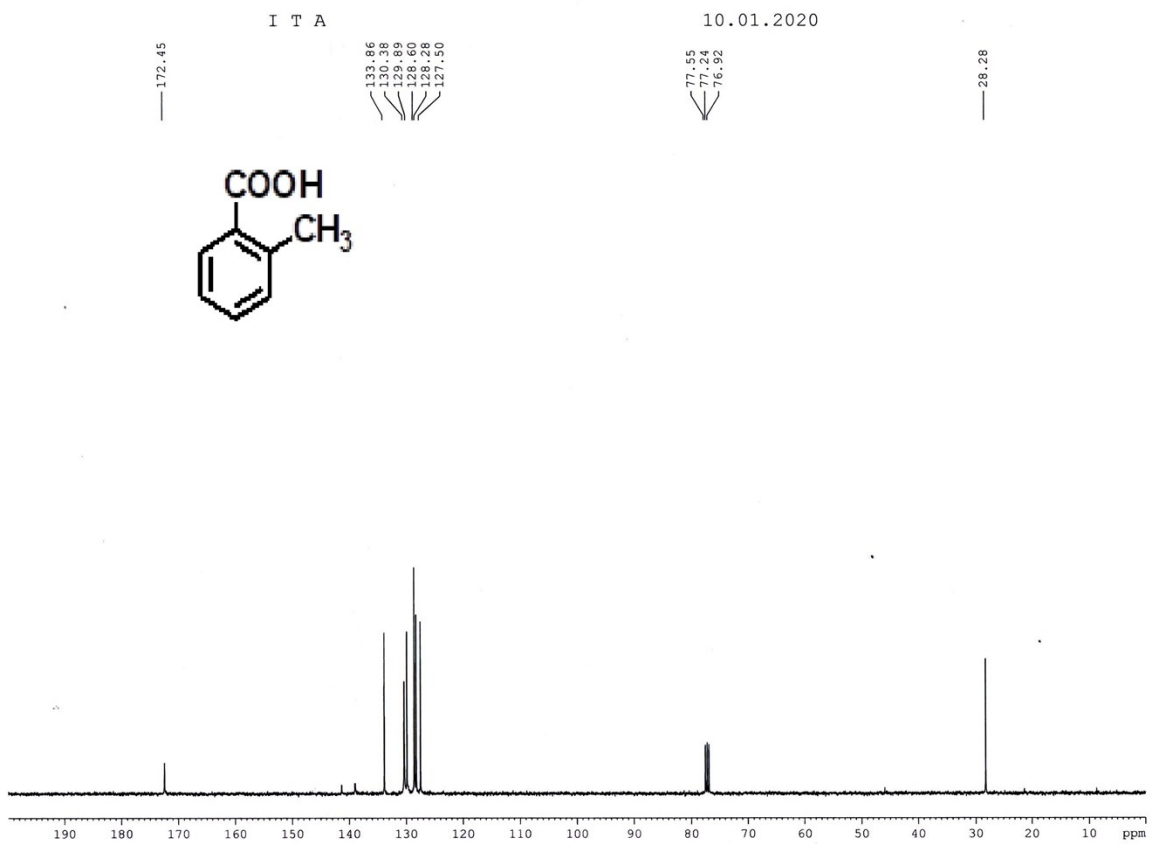

**Figure 18:  $^{13}\text{C}$  NMR spectra of 2-Methyl-benzoic acid (10)**

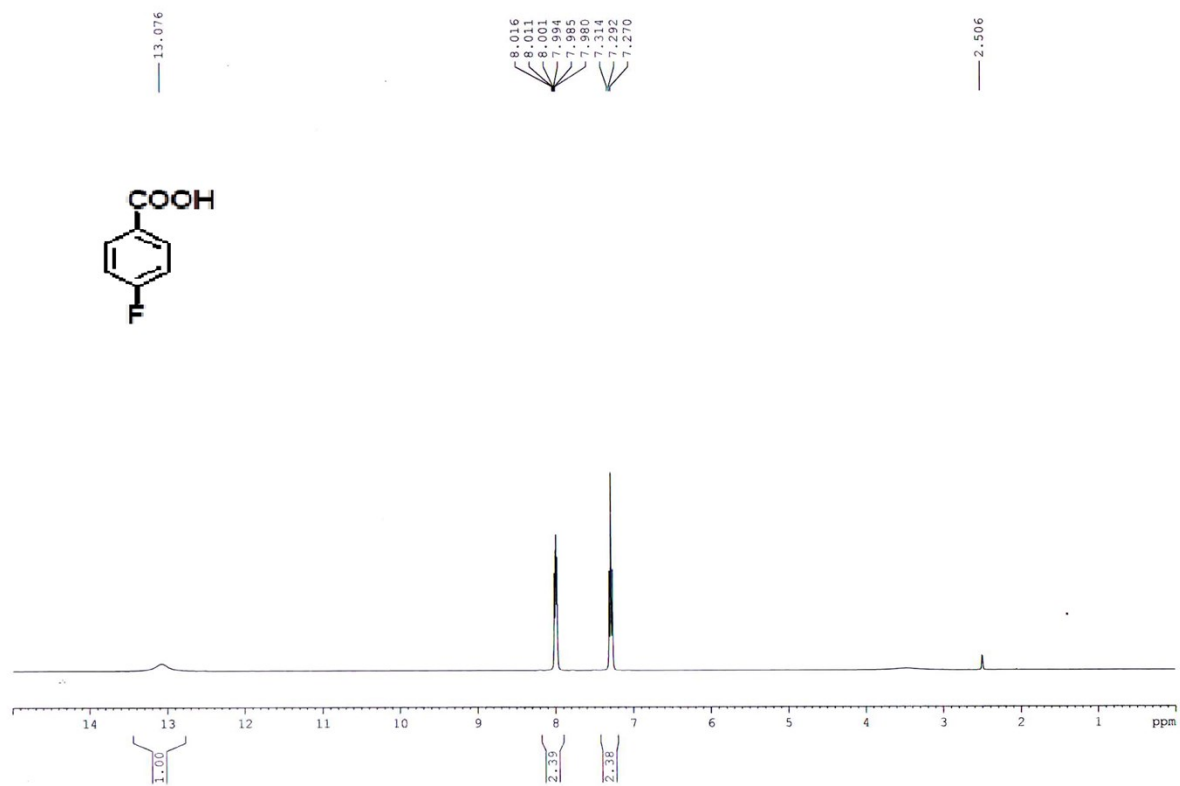

Figure 19: <sup>1</sup>H NMR spectra of 4- Fluoro- benzoic acid (11)



F-Acid

29.01.2021

166.34  
166.10  
163.62

132.11  
132.01  
127.27

115.69  
115.47

40.02  
39.80  
39.60  
39.39  
39.18  
38.97  
38.76

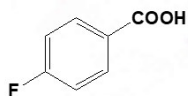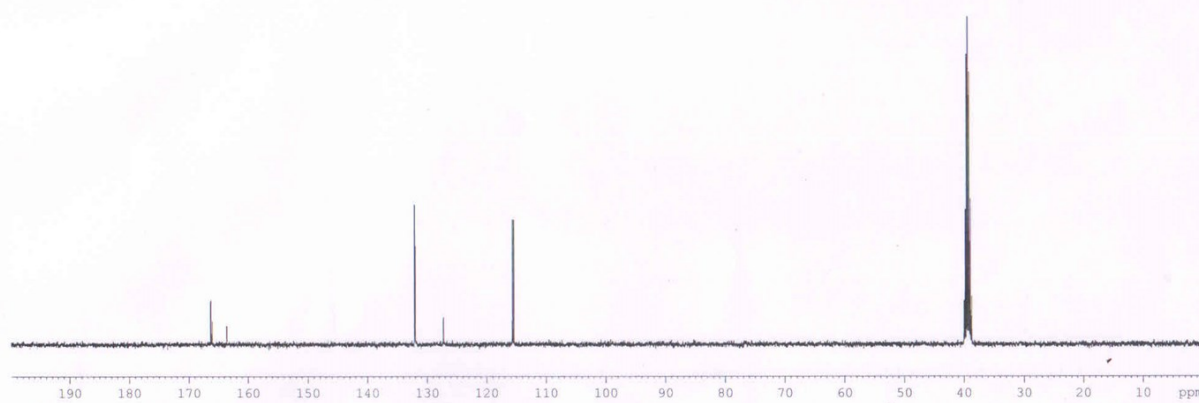

Figure 20: <sup>13</sup>C NMR spectra of 4- Fluoro- benzoic acid(11)

19.01.2021

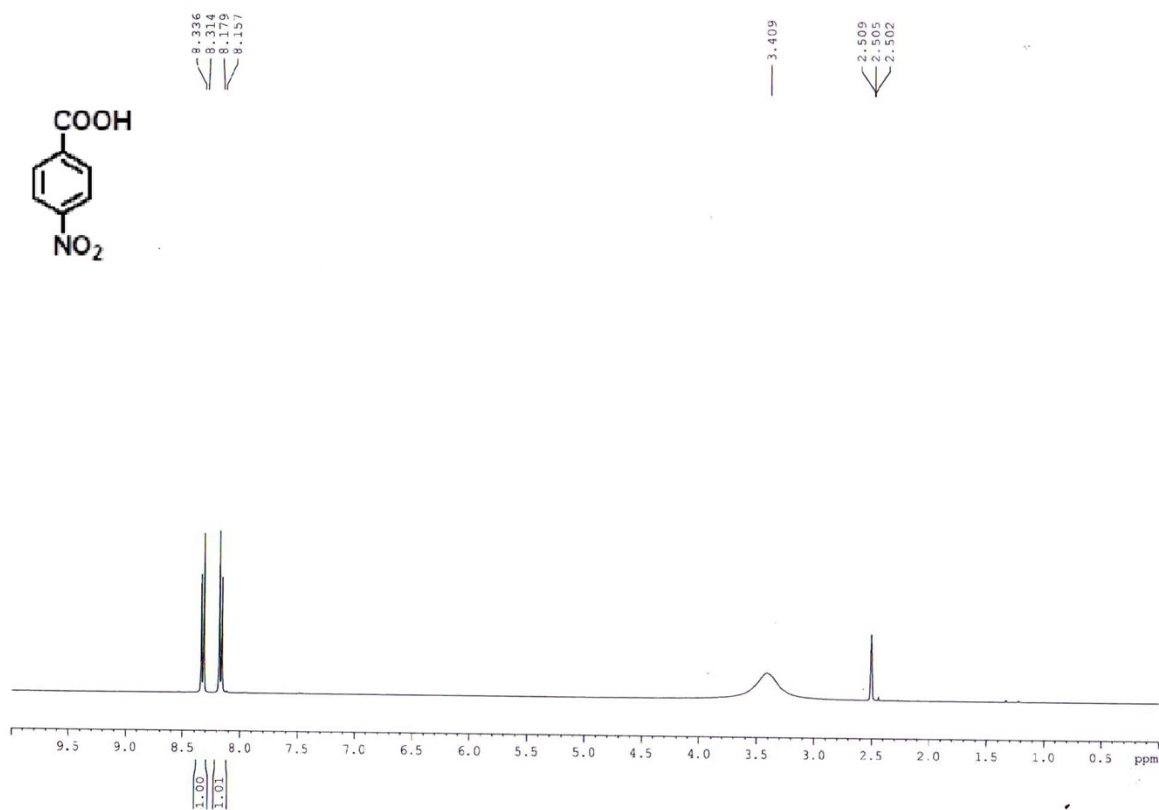

Figure 21:  $^1\text{H}$  NMR spectra of 4- Nitro- benzoic acid (12)

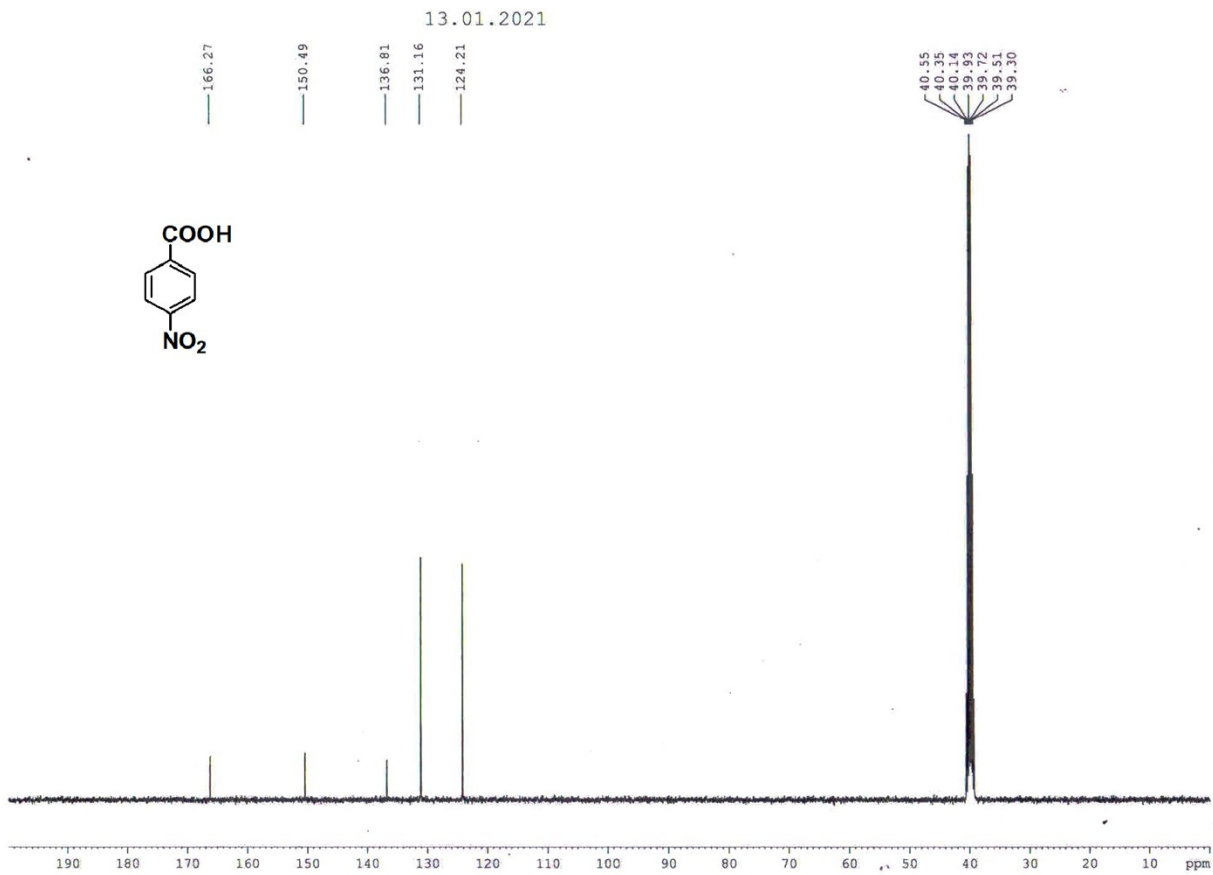

Figure 22:  $^{13}\text{C}$  NMR spectra of 4- Nitro- benzoic acid(12)

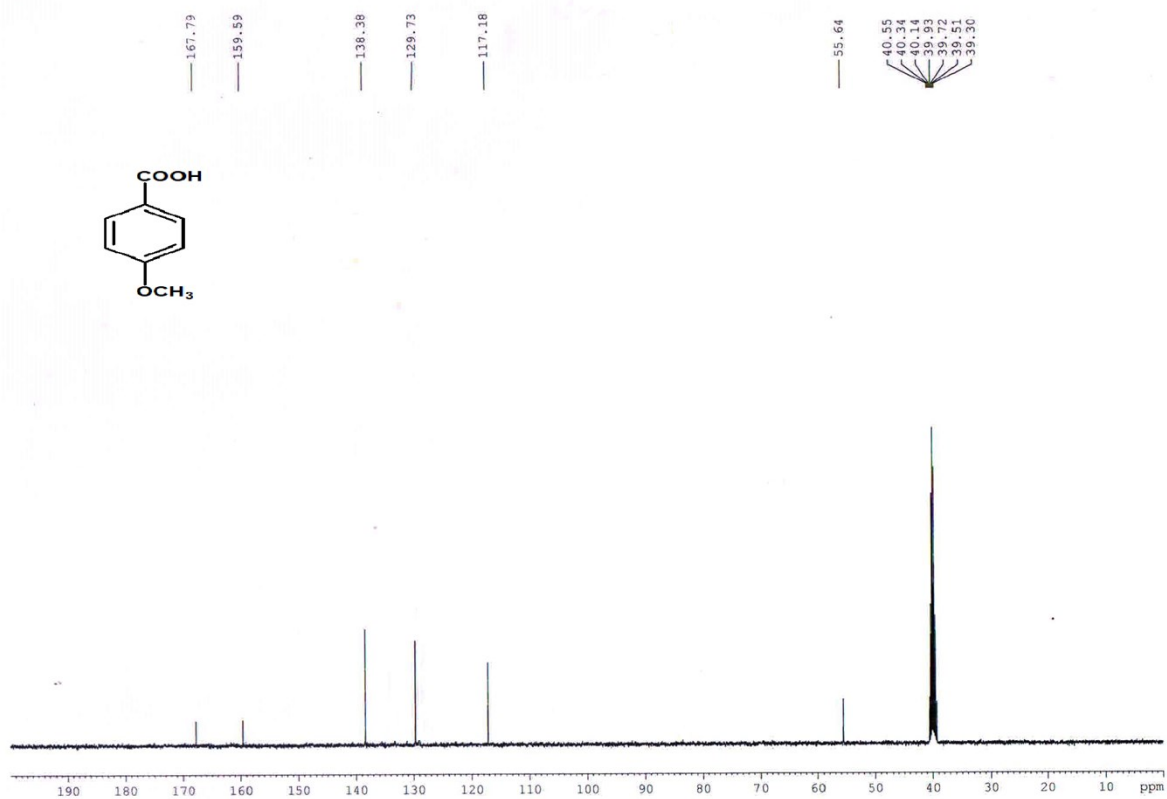

Figure 23: <sup>13</sup>C NMR spectra of 4-Methoxy-benzoic acid (13)
